# Supplementary material for: Synthesis and characteristics of novel layered silicates HUS-2 and HUS-3 derived from a SiO2–choline hydroxide–NaOH–H2O system
Source: Royal Society of Chemistry journal article supplement (doi:10.1039/c2jm31872e), 2012-01-01
Supplement: c2jm31872e.pdf [file c2jm31872e.pdf]

## Supplementary information

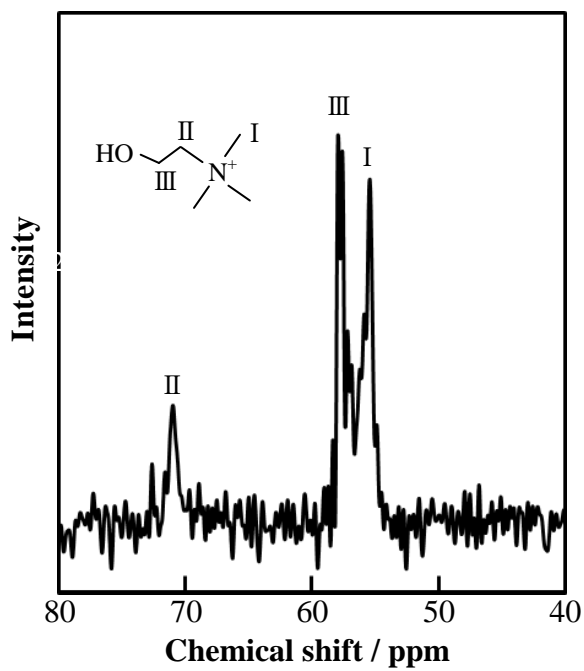

**Figure 1S.**  $^{13}\text{C}$  CP MAS NMR spectrum of HUS-4 (Sample 7).

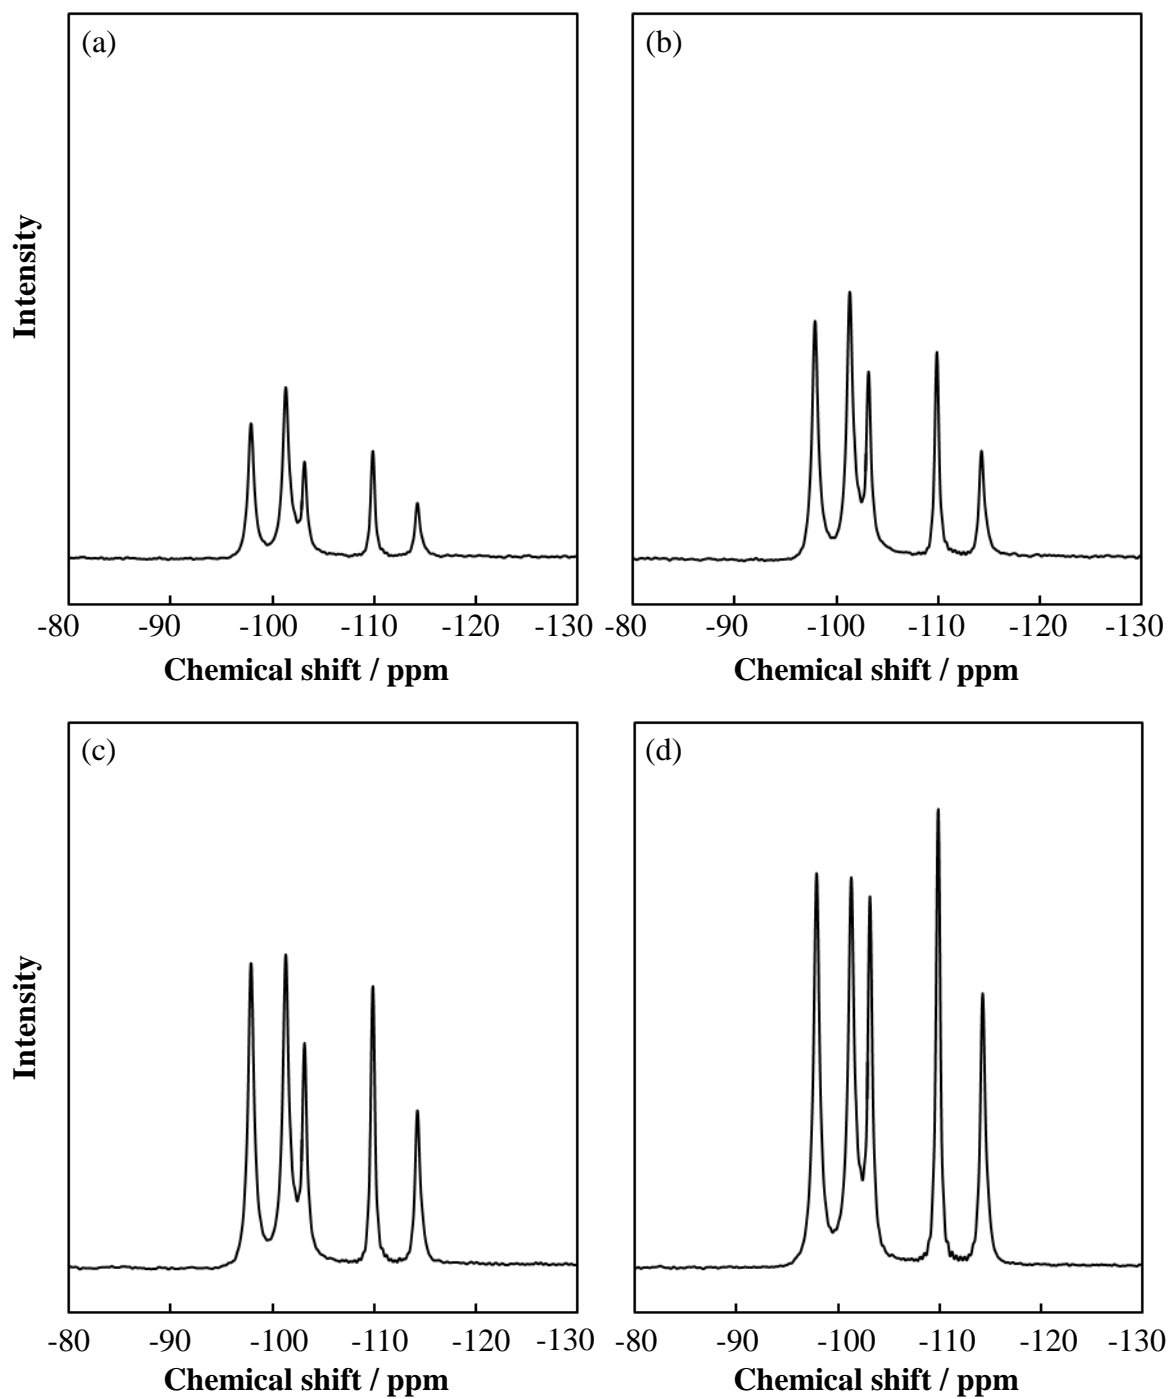

**Figure 2S.**  $^{29}\text{Si}$  CP MAS NMR spectra of HUS-2 (Sample 3) measured at various contact times. (a) 0.5  $\mu\text{s}$ , (b) 1.0  $\mu\text{s}$ , (c) 2.0  $\mu\text{s}$ , and (d) 4.0  $\mu\text{s}$ .
